# Supplementary material for: Dynamic change of neutrophil to lymphocyte ratio and hemorrhagic transformation after thrombolysis in stroke
Source: Springer Nature journal article supplement (doi:10.1186/s12974-016-0680-x), 2016-08-25
Supplement: MOESM1 [file 10625018]

## **ONLINE SUPPLEMENT**

Dynamic Change of Neutrophil to Lymphocyte Ratio and Hemorrhagic Transformation after Thrombolysis in Stroke

**Supplemental Table I. Demographic and Clinical Characteristics of Included and Excluded Patients**

| Characteristics                                | Patients included | Patients excluded | <i>P</i> |
|------------------------------------------------|-------------------|-------------------|----------|
| No. of patients                                | 189               | 55                |          |
| Age, years, mean (SD)                          | 65.0±10.6         | 66.2±12.5         | 0.467    |
| Female, (%)                                    | 66 (34.9)         | 20 (36.4)         | 0.844    |
| Body mass index, kg/m <sup>2</sup> , mean (SD) | 24.3±3.1          | 24.4±3.3          | 0.926    |
| Hypertension, (%)                              | 122 (64.6)        | 40 (72.7)         | 0.259    |
| Diabetes, %                                    | 57 (30.2)         | 18 (32.7)         | 0.716    |
| Hyperlipidemia, %                              | 85 (45.0)         | 22 (40.0)         | 0.513    |
| Previous stroke, %                             | 19 (10.1)         | 8 (14.5)          | 0.350    |
| Coronary artery disease, %                     | 23 (12.2)         | 9 (16.4)          | 0.417    |
| Atrial fibrillation, %                         | 60 (31.7)         | 21 (38.2)         | 0.372    |
| Current smoker, %                              | 61 (32.3)         | 14 (25.5)         | 0.335    |
| Ongoing antiplatelet therapy, %                | 16 (8.5)          | 7 (12.7)          | 0.341    |
| Baseline NIHSS, median (IQR)                   | 12 (6-16)         | 14 (11-19.5)      | 0.004    |
| Onset to treatment, min, mean (SD)             | 173.0±49.6        | 178.9±44.6        | 0.423    |
| IV rtPA + endovascular therapy, %              | 58 (30.7)         | 20 (36.4)         | 0.427    |

IV rtPA indicates intravenous recombinant tissue plasminogen activator; NIHSS, National Institutes of Health Stroke Scale; SD, standard deviation.

**Supplemental Table II. Demographic and Clinical Characteristics of Included Patients from Different Hospitals**

| Characteristics                                | Jinling Hospital | PLA 123 Hospital | <i>P</i> |
|------------------------------------------------|------------------|------------------|----------|
| No. of patients                                | 105              | 84               |          |
| Age, years, mean (SD)                          | 65.4±9.8         | 64.5±11.5        | 0.467    |
| Female, (%)                                    | 37 (35.2)        | 29 (34.5)        | 0.918    |
| Body mass index, kg/m <sup>2</sup> , mean (SD) | 24.6±3.1         | 24.1±3.0         | 0.926    |
| Hypertension, (%)                              | 72 (68.6)        | 50 (59.5)        | 0.196    |
| Diabetes, %                                    | 28 (26.7)        | 29 (34.5)        | 0.242    |
| Hyperlipidemia, %                              | 56 (43.8)        | 22 (46.4)        | 0.719    |
| Previous stroke, %                             | 12 (11.4)        | 7 (8.3)          | 0.482    |
| Coronary artery disease, %                     | 12 (11.4)        | 11 (13.1)        | 0.728    |
| Atrial fibrillation, %                         | 34 (32.4)        | 26 (42.9)        | 0.834    |
| Current smoker, %                              | 37 (35.2)        | 24 (28.6)        | 0.330    |
| Ongoing antiplatelet therapy, %                | 9 (8.6)          | 7 (8.3)          | 0.953    |
| Baseline NIHSS, median (IQR)                   | 12 (7-17)        | 11 (6-15)        | 0.306    |
| Onset to treatment, min, mean (SD)             | 173.6±51.4       | 171.2±46.8       | 0.423    |
| IV rtPA + endovascular therapy, %              | 30 (28.6)        | 28 (33.3)        | 0.481    |
| PH, %                                          | 15 (14.3)        | 13 (15.5)        | 0.819    |
| sICH, %                                        | 9 (8.6)          | 8 (9.5)          | 0.820    |

IV rtPA indicates intravenous recombinant tissue plasminogen activator; NIHSS, National Institutes of Health Stroke Scale; PH, parenchymal hemorrhage; SD, standard deviation; sICH, symptomatic intracranial hemorrhage.

**Supplemental Table III. Temporal Profile of Plasma Neutrophil to Lymphocyte Ratio (NLR) in Stroke Patients Treated with rtPA  
Regarding the Presence of PH or sICH**

|               | No PH            | PH                   | No sICH           | sICH                 |
|---------------|------------------|----------------------|-------------------|----------------------|
| Admission NLR | 2.73 (1.91-4.00) | 2.86 (1.78-4.13)     | 2.99 (1.94-4.05)  | 2.64 (1.67-3.34)     |
| 3-6 h NLR     | 4.99 (3.09-6.62) | 7.64 (5.47-8.17)*    | 5.26 (3.21-7.05)  | 7.35 (5.07-7.72)#    |
| 12-18 h NLR   | 5.86 (4.18-9.28) | 14.66 (10.75-16.28)* | 6.28 (4.27-10.43) | 14.22 (8.68-17.25)## |
| 36-48 h NLR   | 5.77 (3.74-9.57) | 14.69 (9.77-15.21)*  | 6.13 (4.23-10.15) | 14.50 (6.48-16.72)## |

PH indicates parenchymal hemorrhage; sICH, symptomatic intracranial hemorrhage. \* indicates  $P < 0.001$  compared with the No PH group.

# indicates  $P=0.009$  compared with the No sICH group, ## indicates  $P < 0.001$  compared with the No sICH group.

**Supplemental Table IV. Values of the Plasma Neutrophil Level, Lymphocyte Level and Neutrophil to Lymphocyte Ratio (NLR) Level in auxiliary diagnosis of PH and sICH**

|             | PH    |             |          | sICH  |             |          |
|-------------|-------|-------------|----------|-------|-------------|----------|
|             | AUC   | 95% CI      | <i>P</i> | AUC   | 95% CI      | <i>P</i> |
| Time I      |       |             |          |       |             |          |
| Neutrophils | 0.569 | 0.449-0.689 | 0.243    | 0.524 | 0.395-0.654 | 0.740    |
| Lymphocytes | 0.441 | 0.327-0.554 | 0.318    | 0.520 | 0.402-0.637 | 0.789    |
| NLR         | 0.514 | 0.395-0.632 | 0.819    | 0.419 | 0.299-0.540 | 0.274    |
| Time II     |       |             |          |       |             |          |
| Neutrophils | 0.682 | 0.596-0.769 | 0.002    | 0.726 | 0.632-0.821 | 0.002    |
| Lymphocytes | 0.285 | 0.199-0.371 | < 0.001  | 0.323 | 0.230-0.415 | 0.016    |
| NLR         | 0.717 | 0.630-0.803 | < 0.001  | 0.691 | 0.597-0.785 | 0.009    |
| Time III    |       |             |          |       |             |          |
| Neutrophils | 0.797 | 0.711-0.884 | < 0.001  | 0.805 | 0.705-0.906 | < 0.001  |
| Lymphocytes | 0.169 | 0.102-0.237 | < 0.001  | 0.176 | 0.089-0.264 | < 0.001  |
| NLR         | 0.833 | 0.764-0.903 | < 0.001  | 0.814 | 0.728-0.900 | < 0.001  |
| Time IV     |       |             |          |       |             |          |

|             |       |             |         |       |             |         |
|-------------|-------|-------------|---------|-------|-------------|---------|
| Neutrophils | 0.763 | 0.677-0.849 | < 0.001 | 0.729 | 0.629-0.829 | < 0.001 |
| Lymphocytes | 0.167 | 0.096-0.237 | < 0.001 | 0.229 | 0.127-0.331 | < 0.001 |
| NLR         | 0.830 | 0.758-0.902 | < 0.001 | 0.766 | 0.666-0.866 | < 0.001 |

---

AUC indicates area under curve; PH, parenchymal hematomas; sICH, symptomatic intracranial hemorrhage; I, II, III and IV, on behalf of their respective admission and 3-6, 12-18, 36-48 hours after treatment with intravenous rtPA.

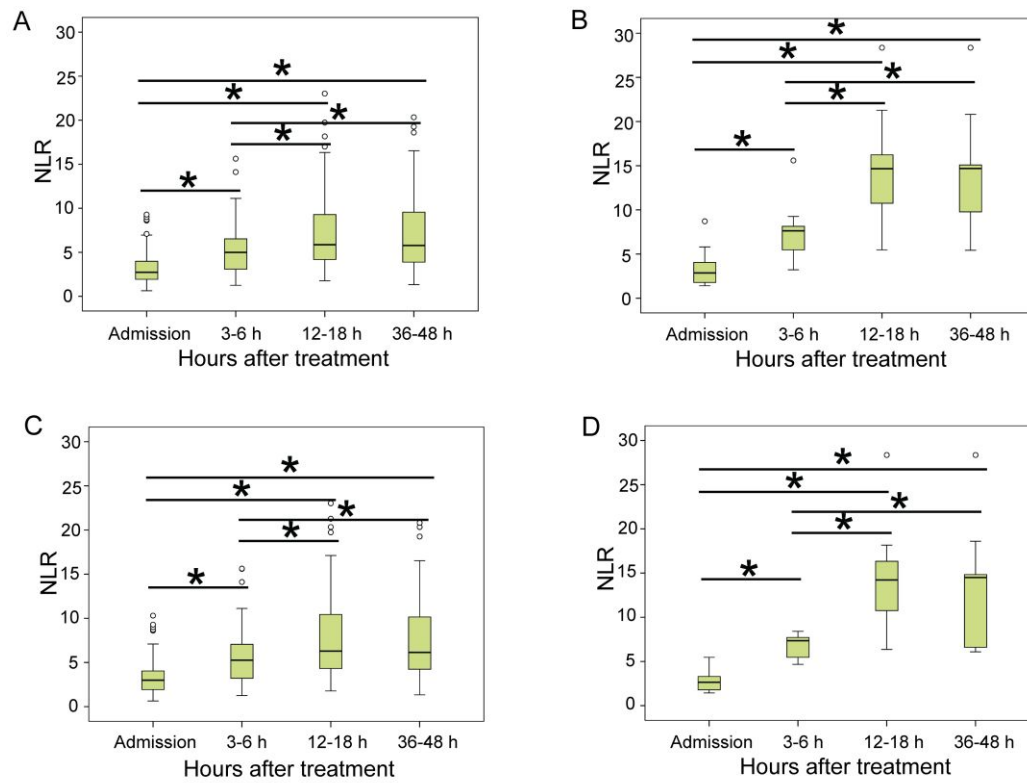

**Supplemental Figure I. Temporal profile of plasma Neutrophil to Lymphocyte Ratio (NLR) in stroke patients treated with rtPA regarding the presence of parenchymal hemorrhage (PH) or the presence of symptomatic intracranial hemorrhage (sICH)**

(A) temporal profile of plasma NLR in No PH; (B) temporal profile of plasma NLR in PH; (C) temporal profile of plasma NLR in No sICH; (D) temporal profile of plasma NLR in sICH. \*  $P < 0.001$ .

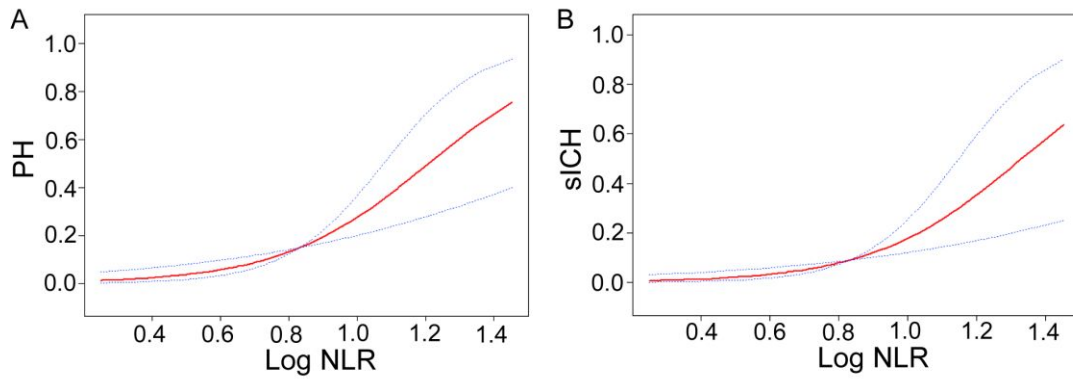

**Supplemental Figure II. Plasma Neutrophil to Lymphocyte Ratio (NLR) level and hemorrhagic transformation dose-response relationship.** (A) NLR and parenchymal hemorrhage (PH); adjusted for age, sex, ongoing antiplatelet therapy and baseline NIHSS. (B) NLR and symptomatic intracranial hemorrhage (sICH); adjusted for age, sex, atrial fibrillation and ongoing antiplatelet therapy. The analyses were performed using Empower(R) ([www.empowerstats.com](http://www.empowerstats.com), X&Y solutions, inc. Boston MA) and R (<http://www.R-project.org>) ( Environmental research. 2013;121:79-83). The NLR was transformed to the Log10 scale (Log NLR) for analysis.



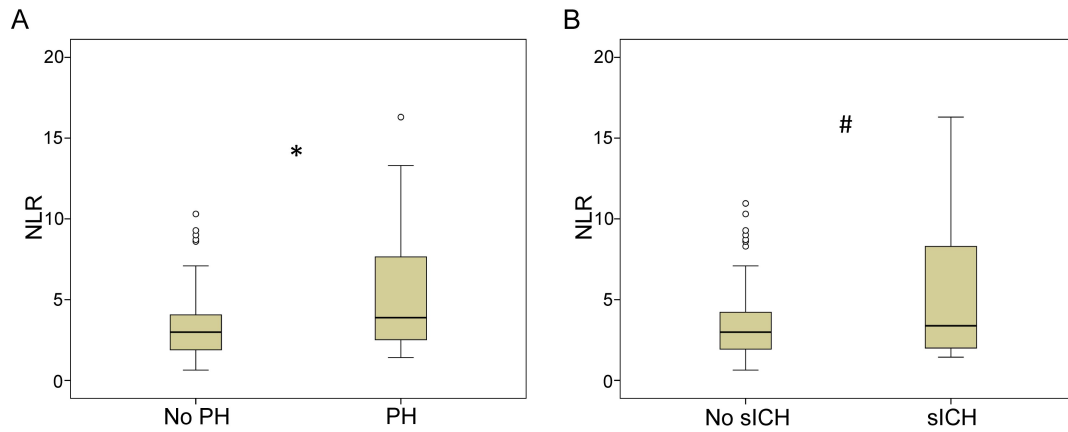

**Supplemental Figure III.** The levels of baseline Neutrophil to Lymphocyte Ratio (NLR) according to the presence of hemorrhagic transformation in all patients including those patients with infection or other conditions. (A) The levels of baseline NLR regarding the presence of parenchymal hemorrhage (PH); (B) The levels of baseline NLR regarding the presence of symptomatic intracranial hemorrhage (sICH). \*  $P=0.002$  between patients with and without PH; #  $P=0.046$  between patients with and without sICH.
